# Supplementary material
Source: Springer Nature journal article supplement (https://www.springermedizin.de/resource/supplementary/12943_2012_1098_MOESM2_ESM.pdf/9552480)

**A**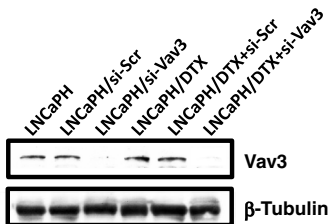**B**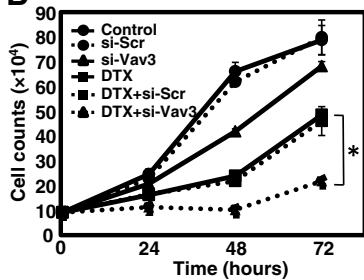**C**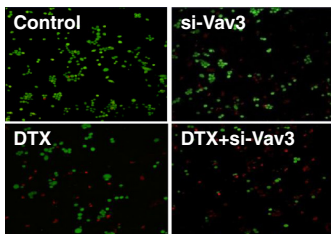**D**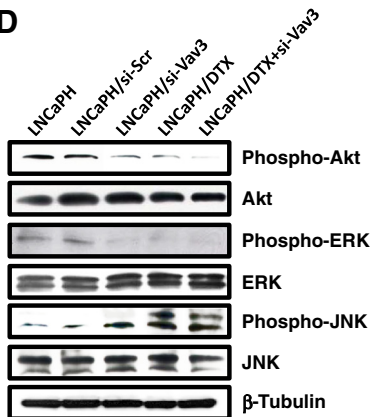**E**

|      | LNCaPH | si-Scr | si-Vav3 | DTX   | DTX+si-Vav3 |
|------|--------|--------|---------|-------|-------------|
| pAkt | 1.00   | 0.98   | 0.38*   | 0.32* | 0.09*       |
| pERK | 1.00   | 1.02   | 0.22*   | 0.19* | 0.08*       |
| pJNK | 1.00   | 0.98   | 1.18    | 9.68* | 9.52*       |

Supplement: MOESM2 [file 9552480]
